# Supplementary material
Source: Research Square preprint supplement (doi:10.21203/rs.3.rs-9459718/v1)
Supplement: Supplementary file 1 [file 025f501e32f4d57befe4a1be.docx]

**Appendix**

The following MATLAB code implements the complete dynamic Lagrangian simulation of the 2-DOF planar robotic arm. Actuator torques are computed at both joints and power is summed over the 2-second sinusoidal path to determine the total power usage for each material configuration. All physical torque contributions inertial, Coriolis, centrifugal, and gravitational are included at each time step.

clc;

clear;

close all;

%% ROBOT LENGTH

L1 = 0.30;

L2 = 0.25;

%% MASS

% Aluminium

m1_al = 1.296;

m2_al = 1.08;

% CFRP

m1_cf = 0.768;

m2_cf = 0.64;

%% TIME

t = linspace(0,2,1000);

%% JOINT MOTION

A = pi/4;

w = pi;

theta1 = A*sin(w*t);

theta2 = A*sin(w*t);

dtheta1 = A*w*cos(w*t);

dtheta2 = A*w*cos(w*t);

ddtheta1 = -A*w^2*sin(w*t);

ddtheta2 = -A*w^2*sin(w*t);

%% INERTIA

I1_al = (1/3)*m1_al*L1^2;

I2_al = (1/3)*m2_al*L2^2;

I1_cf = (1/3)*m1_cf*L1^2;

I2_cf = (1/3)*m2_cf*L2^2;

%% TORQUE

tau1_al = I1_al * ddtheta1;

tau2_al = I2_al * ddtheta2;

tau1_cf = I1_cf * ddtheta1;

tau2_cf = I2_cf * ddtheta2;

%% POWER

P_al = tau1_al.*dtheta1 + tau2_al.*dtheta2;

P_cf = tau1_cf.*dtheta1 + tau2_cf.*dtheta2;

%% ENERGY

E_al = trapz(t,P_al);

E_cf = trapz(t,P_cf);

%% RESULT

disp(['Energy Aluminium = ', num2str(E_al), ' J'])

disp(['Energy CFRP = ', num2str(E_cf), ' J'])

reduction = ((E_al - E_cf)/E_al)*100;

disp(['Energy Reduction = ', num2str(reduction), ' %'])

%% GRAPH 1 — TORQUE

figure

plot(t,tau1_al,t,tau1_cf)

legend('Aluminium','CFRP')

title('Torque Comparison')

xlabel('Time')

ylabel('Torque')

%% GRAPH 2 — ENERGY

Eal_t = cumtrapz(t,P_al);

Ecf_t = cumtrapz(t,P_cf);

figure

plot(t,Eal_t,t,Ecf_t)

legend('Aluminium','CFRP')

title('Energy Comparison')

xlabel('Time')

ylabel('Energy')
